# Supplementary material for: Fabrication of intelligent photonic crystal hydrogel sensors for selective detection of trace mercury ions in seawater
Source: Royal Society of Chemistry journal article supplement (doi:10.1039/c7tc02140b), 2017-01-01
Supplement: c7tc02140b1.pdf [file c7tc02140b1.pdf]

## Fabrication of Intelligent Photonic Crystal Hydrogel Sensors for Selective Detection of Trace Mercury Ions in Seawater

Junjie Qin, Bohua Dong, Xue Li, Jiwei Han, Rongjie Gao, Ge Su, Lixin Cao\* and Wei Wang\*

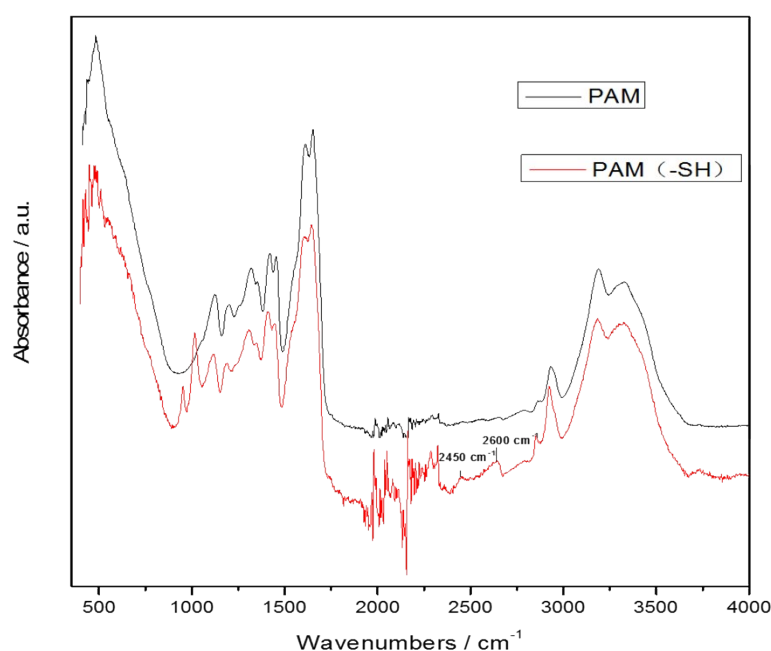

Fig. S1. FTIR spectra of (a) pure polyacrylamide hydrogel and (b) functionalized polyacrylamide hydrogel with 8 wt% N, N'-cystaminebisacrylamide. In the hydrogel formation, N, N'-methylenebisacrylamide was used as crosslinker, and the hydrogels were washed by deionized water before drying. In the spectrum of functionalized hydrogel, we can clearly see the new vibration bands from S-H stretching in 2400-2650 cm<sup>-1</sup> and from C-SH stretching in 950-1100 cm<sup>-1</sup>, which confirms the existence of grafted -SH groups in the hydrogel.

Table S1. Average size and polydispersity of synthesized polystyrene nanoparticles in 1 mM KCl solution measured by dynamic light scattering method with a Brookhaven 90 plus PALS Zeta potential analyser.

| Sample ID | Eff. Diam. (nm) | Polydispersity | Baseline Index |
|-----------|-----------------|----------------|----------------|
| lxps - 1  | 96.55           | 0.002          | 9.2            |
| lxps - 2  | 98.07           | 0.015          | 8.2            |
| lxps - 3  | 98.79           | 0.001          | 8.9            |
| Mean:     | 97.80           | 0.006          | 8.8            |
| Std Err:  | 0.66            | 0.004          | 0.3            |
| Std Dev:  | 1.14            | 0.008          | 0.5            |

Table S2. Zeta potential of synthesized polystyrene nanoparticles in 1 mM KCl solution measured by a Brookhaven 90 plus PALS Zeta potential analyser.

| Sample ID | Zeta Potential (mV) | Mobility ( $\mu\text{s}/(\text{V}/\text{cm})$ ) | RMS Residual |
|-----------|---------------------|-------------------------------------------------|--------------|
| PS - 1    | -45.87              | -3.58                                           | 3.8393e-02   |
| PS - 2    | -42.55              | -3.32                                           | 7.8636e-02   |
| PS - 3    | -44.62              | -3.49                                           | 5.4155e-02   |
| Mean:     | -44.35              | -3.47                                           | 5.7062e-02   |
| Std Err:  | 0.97                | 0.08                                            | 1.1708e-02   |
| Std Dev:  | 1.68                | 0.13                                            | 2.0278e-02   |

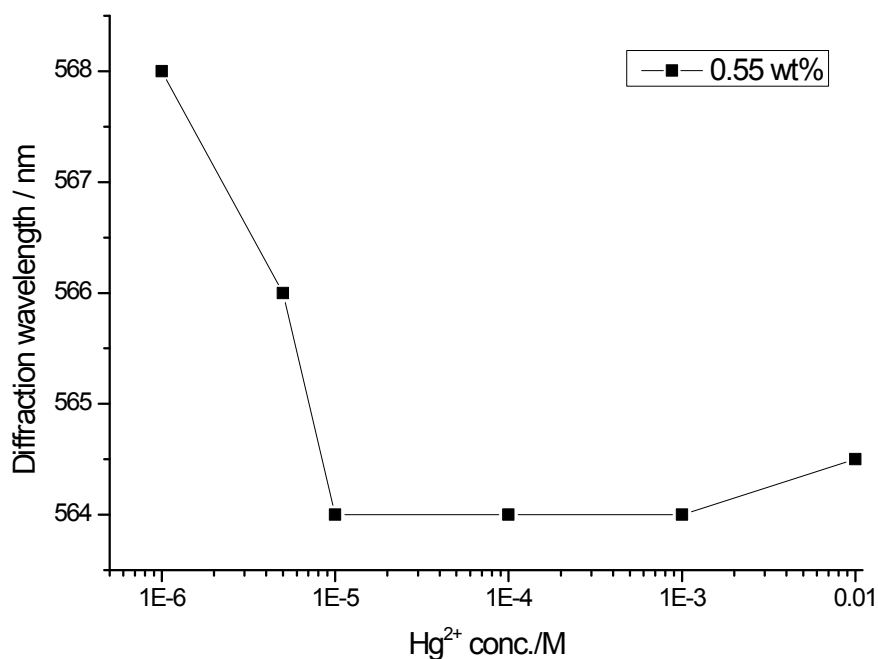

Fig. S2. Relationship between diffraction wavelength of hydrogel and concentration of  $\text{Hg}^{2+}$  ions at high concentration range in seawater. The hydrogel is functionalized by N, N'-cystaminebisacrylamide at 0.55 wt%. The interaction of -SH groups and  $\text{Hg}^{2+}$  ions has reached a threshold of saturation at the concentration of  $\text{Hg}^{2+}$  above  $\sim 10^{-5}$  M and thus no further linear relationship exists between the diffracted wavelength and the bounded  $\text{Hg}^{2+}$  ions in the hydrogel.
